# Supplementary material for: Blended intervention based on acceptance and commitment therapy for informal caregivers of people with dementia (ACT-IC): protocol of a mixed-methods feasibility study
Source: HighWire-hosted journal article supplement (doi:10.1136/bmjopen-2022-070499), 2023-09-01
Supplement: bmjopen-2022-070499supp002_data_supplement.pdf [file bmjopen-2022-070499supp002_data_supplement.pdf]

Semi-structured interview for the coach (post-intervention):

You started as the motivational coach during the ACT-IC intervention. Please tell us about your experience and your role.  
This questionnaire consists of both closed and open questions. You can always provide an explanation for your response;

| <b>Motivational coach of the "ACT-IC" intervention</b>                                                                   | 1= Strongly agree<br>7= Strongly disagree | <b>Reflection</b>                                                                                                                            |
|--------------------------------------------------------------------------------------------------------------------------|-------------------------------------------|----------------------------------------------------------------------------------------------------------------------------------------------|
| <b>1. As a coach, I found the intervention useful</b>                                                                    | 1 2 3 4 5 6 7                             | - Why/why not?<br>- Possible points for improvement?                                                                                         |
| <b>2. I could integrate the course into my work</b>                                                                      | 1 2 3 4 5 6 7                             | - Why/why not?<br>- What did/didn't appeal to you in this?                                                                                   |
| <b>3. I think the course had added value for informal caregivers</b>                                                     | 1 2 3 4 5 6 7                             | - Possible points for improvement?                                                                                                           |
| <b>4. I think the course had added value for me as the coach</b>                                                         | 1 2 3 4 5 6 7                             | - Why/why not?                                                                                                                               |
| <b>5. I was able to support the participants according to protocol and as planned</b>                                    | 1 2 3 4 5 6 7                             | - Points of improvement?                                                                                                                     |
| <b>5. I found the use of coaching beneficial and it was clearly visible within my work with the informal caregivers</b>  | 1 2 3 4 5 6 7                             | - Points of improvement?                                                                                                                     |
|                                                                                                                          |                                           | Did you find it complete?<br>- Did you struggle or miss any features?<br>Suggestions?<br>- Would you delete any certain features? Which one? |
| <b>6. Open reflection</b>                                                                                                |                                           |                                                                                                                                              |
| - Is there anything else you would like to say about the use of this intervention or your satisfaction with the program? |                                           |                                                                                                                                              |
